# Supplementary figures and images for: p-Synephrine suppresses inflammatory responses in lipopolysaccharide-stimulated RAW264.7 cells and alleviates systemic inflammatory response syndrome in mice
Source: Royal Society of Chemistry journal article supplement (doi:10.1039/d2fo00299j), 2022-01-01

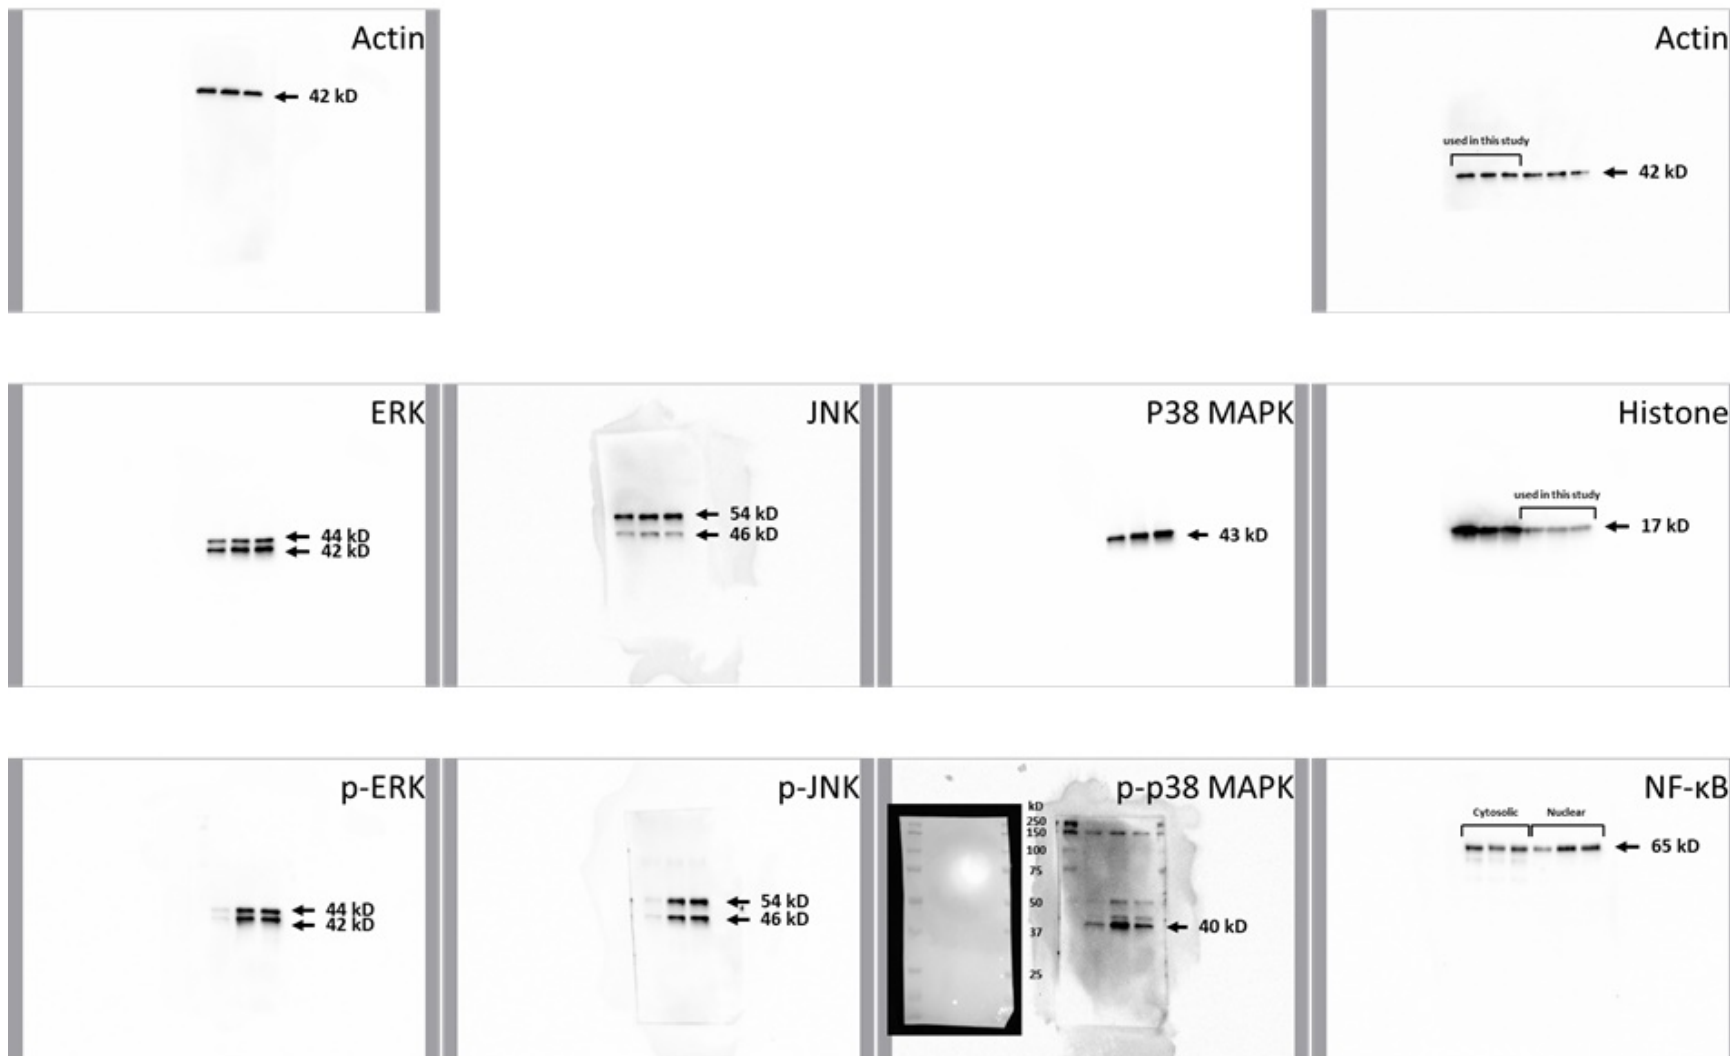

Supplemental Fig.1 Ishida et al.

Supplement: d2fo00299j2.pdf [file d2fo00299j2.pdf]
